# Supplementary material
Source: MDPI journal article supplement (https://www.mdpi.com/1424-2818/16/1/31)
Supplement: s1 [file s1]

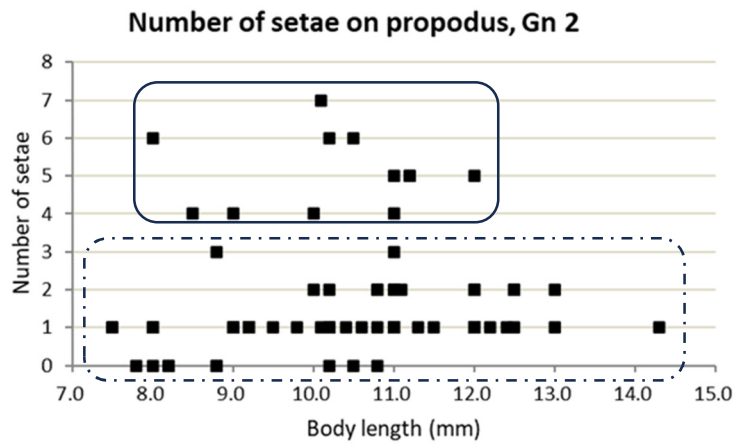

**Figure S1.** Scatterplot of setae number against body length. Broken line: P type; solid line: J type.

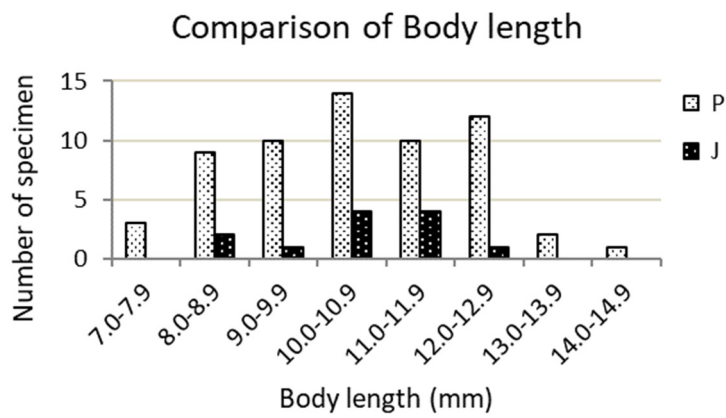

**Figure S2.** Frequency distribution of body length. P: P-type, J: J-type.

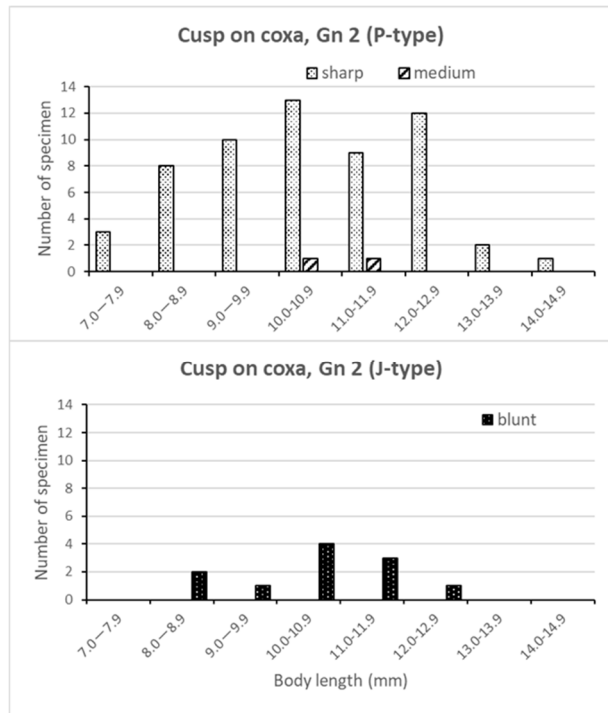

**Figure S3.** Frequency distribution of developmental states of cusp against body length. Upper: P-type; lower: J-type.

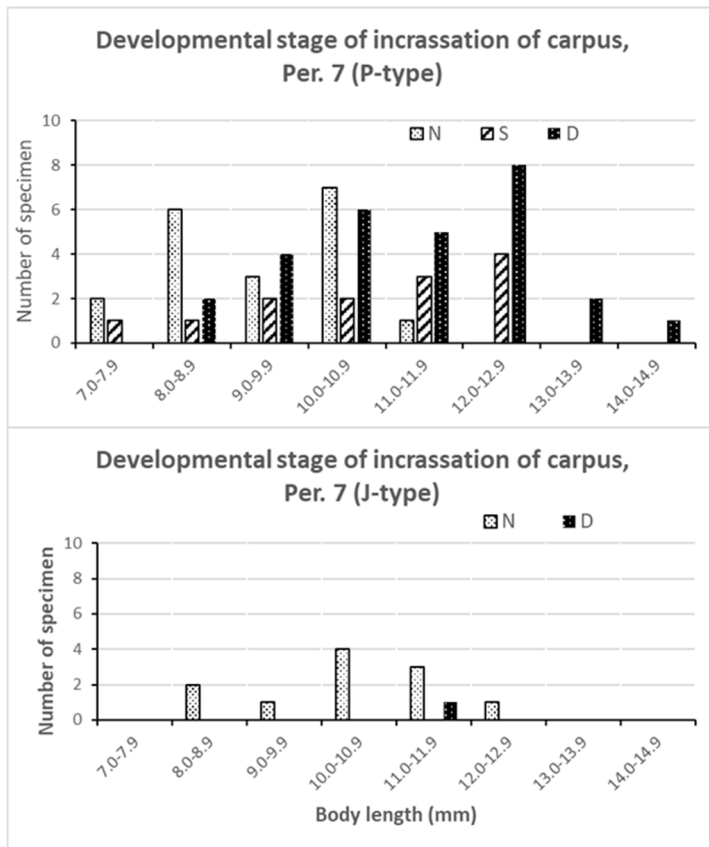

**Figure S4.** Frequency distribution of developmental stages of incrassation against body length. N: none, S: slight, D: distinct. Upper: P-type, lower: J-type.

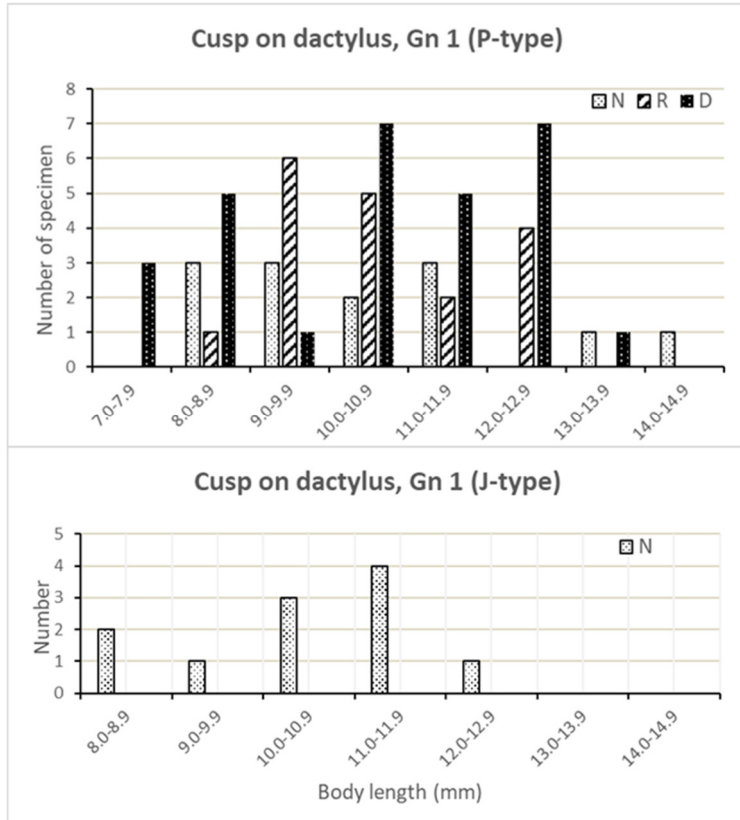

**Figure S5.** Frequency distribution of developmental states of cusp against body length. N: none, R: rudimentary, D: distinct. Upper: P-type, lower: J-type.

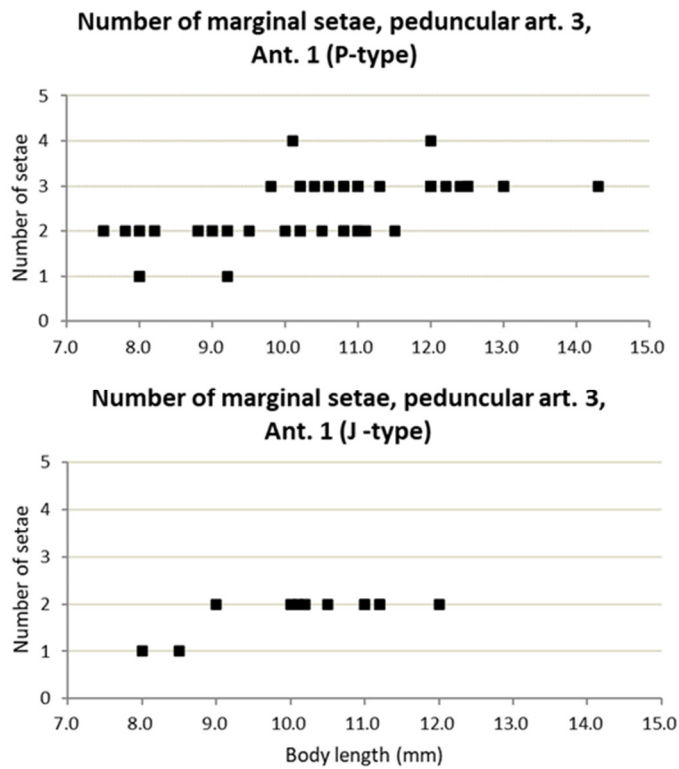

**Figure S6.** Scatterplot of setae number against body length. Upper: P-type, lower: J-type.

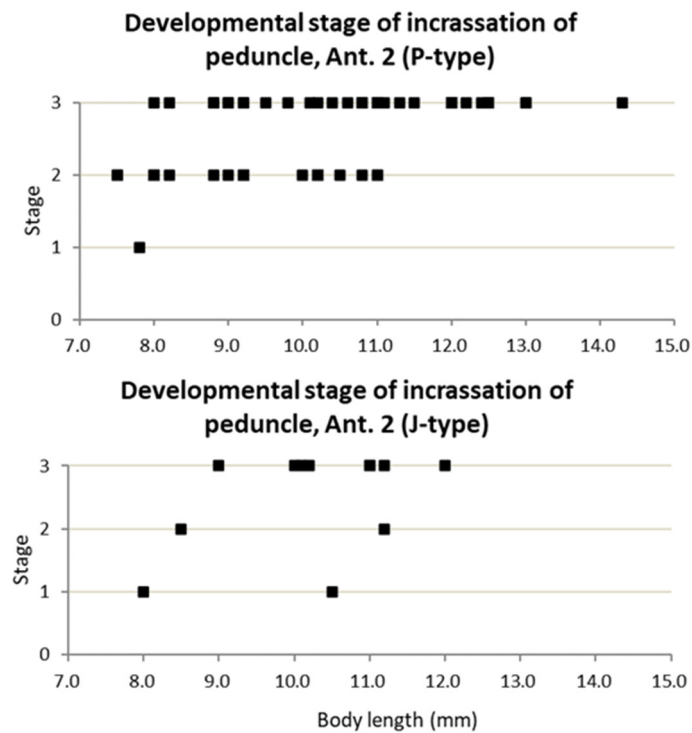

**Figure S7.** Scatterplot of developmental stages of incrassation against body length. Upper: P-type, lower: J-type.

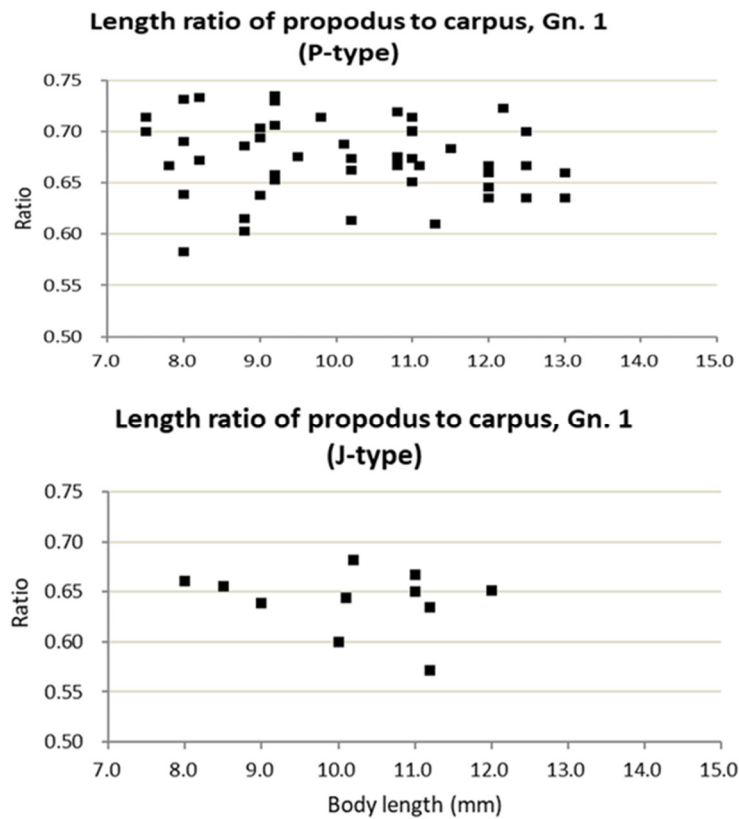

**Figure S8.** Scatterplot of ratios against body length. Upper: P-type, lower: J-type.

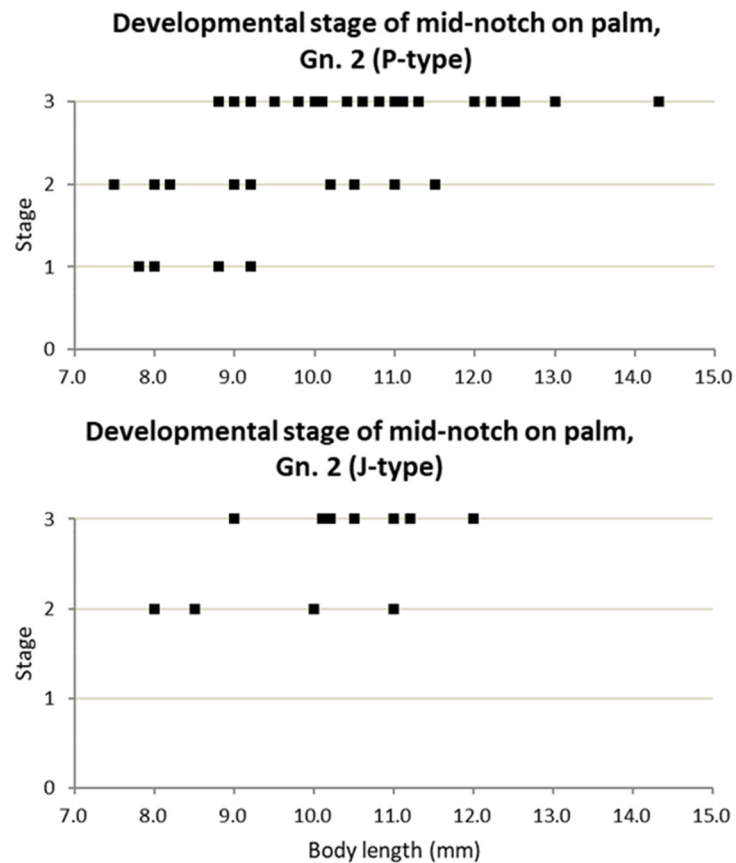

**Figure S9.** Scatterplot of developmental stages of mid-notch against body length. Upper: P-type, lower: J-type.

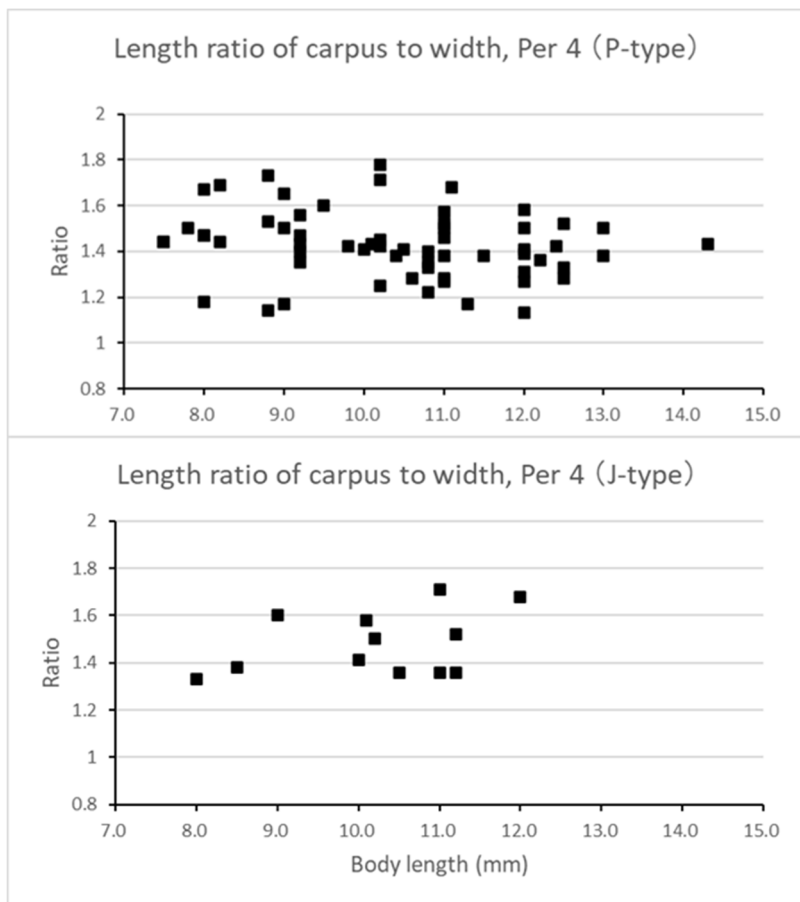

**Figure S10.** Scatterplot of ratio against body length. Upper: P-type, lower: J-type.

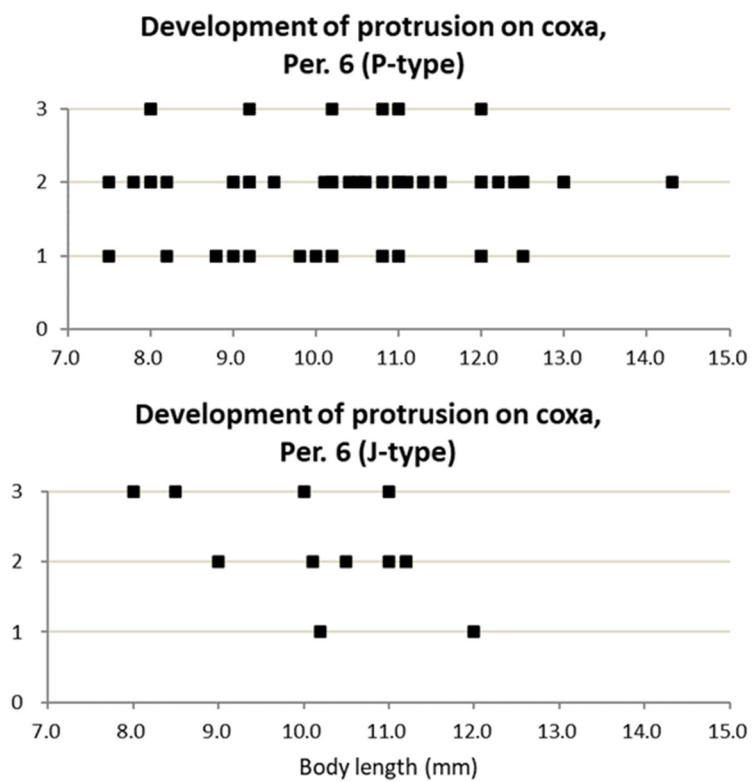

**Figure S11.** Scatterplot of developmental states of protrusion against body length. Upper: P-type, lower: J-type.

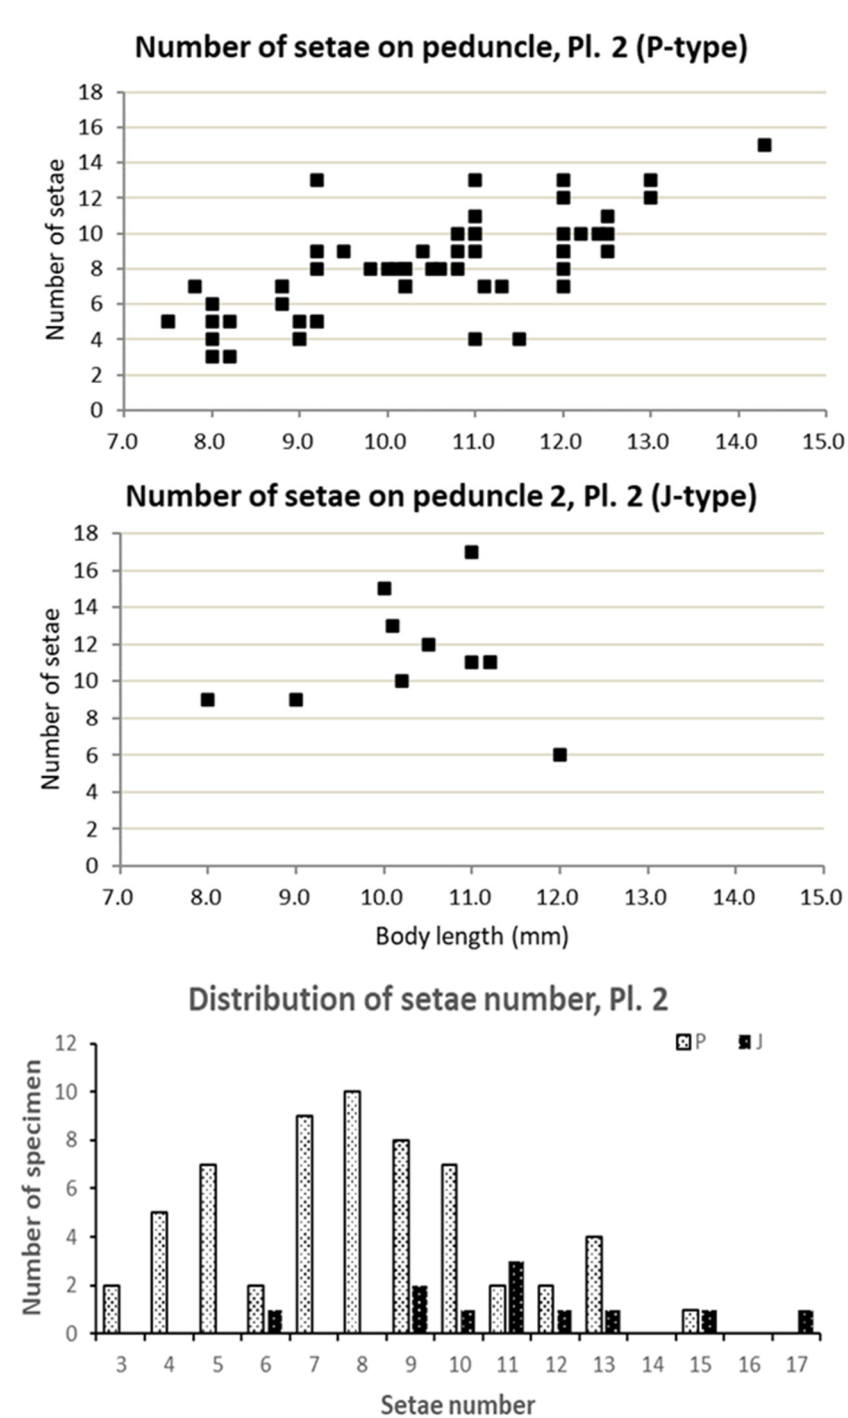

**Figure S12.** Upper and middle: scatterplot of setae numbers on pleopod 2 against body length; upper: P-type, middle: J-type. Lower: frequency distribution of setae numbers on pleopod 2. P: P-type, J: J-type.

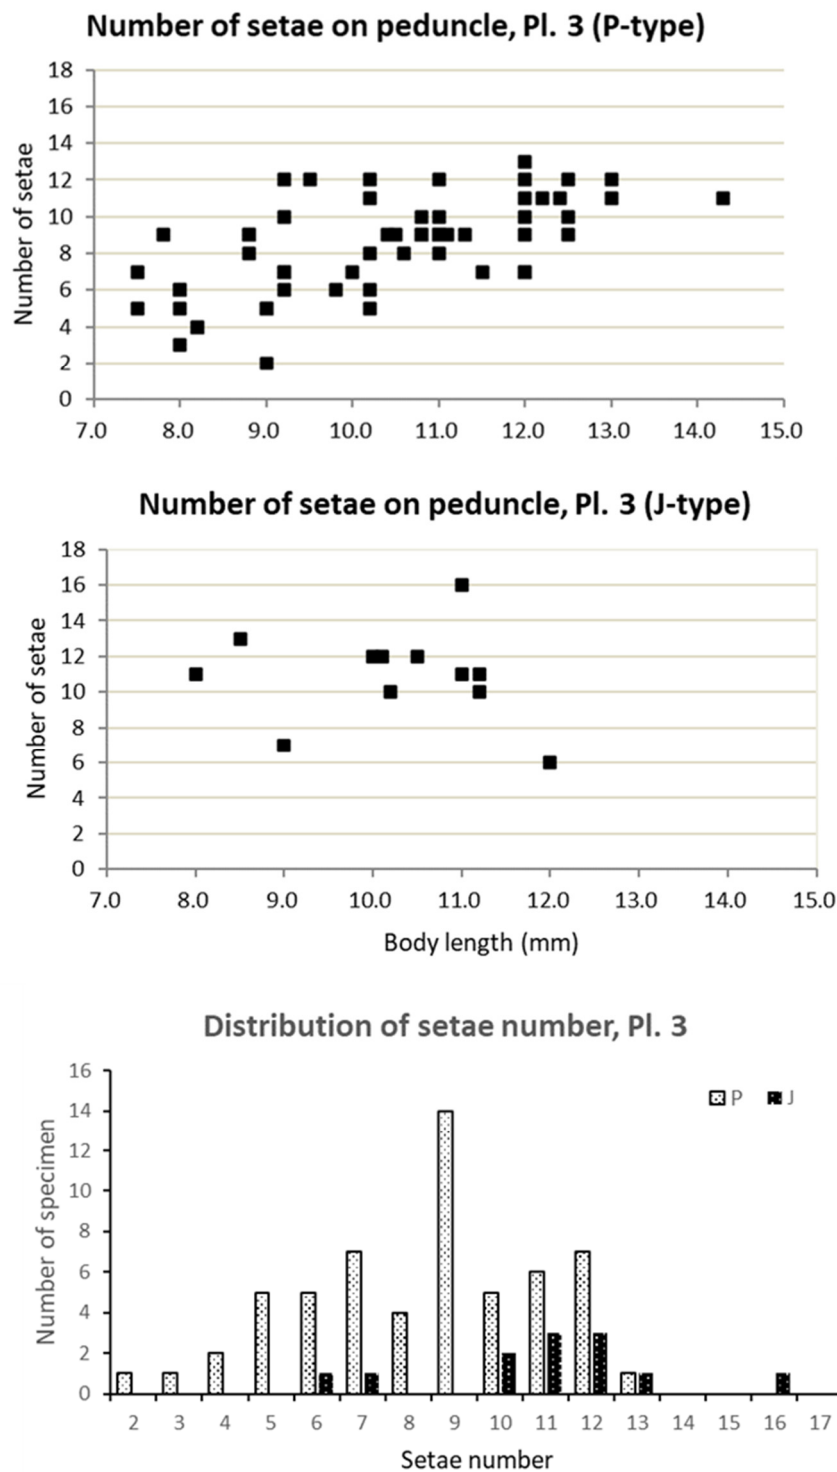

**Figure S13.** Upper and middle: scatterplot of setae numbers on pleopod 3 against body length; upper: P-type, middle: J-type. Lower: frequency distribution of setae numbers on pleopod 3. P: P-type, J: J-type.

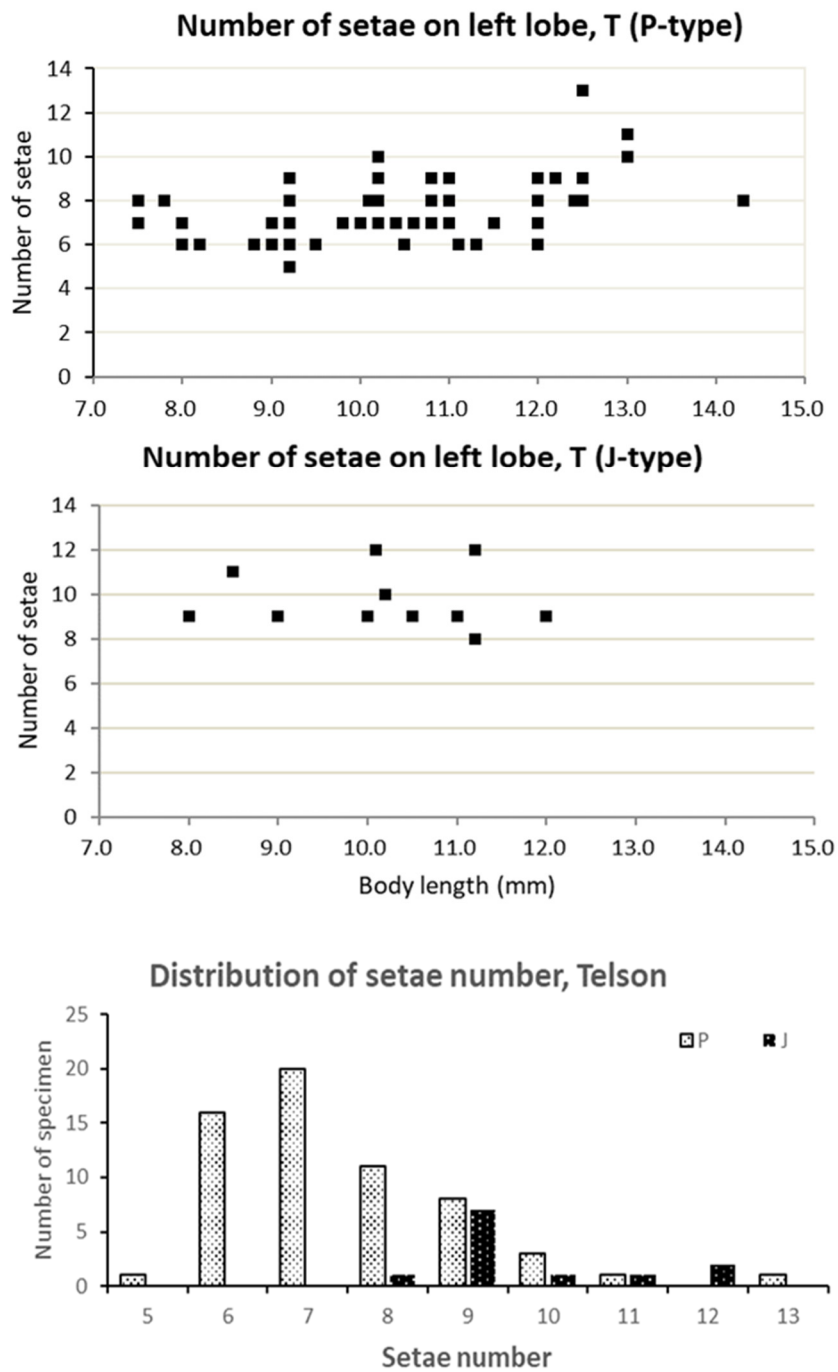

**Figure S14.** Upper and middle: scatterplot of setae numbers on telson against body length. Lower: frequency distribution of setae numbers; P: P-type, J: J-type.
